# Supplementary material
Source: Springer Nature journal article supplement (https://www.springermedizin.de/resource/supplementary/12881_2012_1034_MOESM1_ESM.pdf/9451564)
Supplement: MOESM1 [file 9451564]

■ Non stimulated  
■ Stimulated

*rs2069762*  
+  
*rs2067006*

A G CT Luc

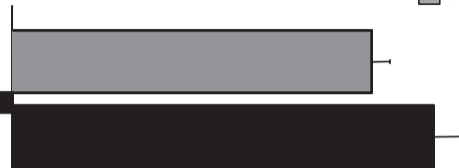

*ss410961576*  
+  
*rs2067006*

A T CT del Luc

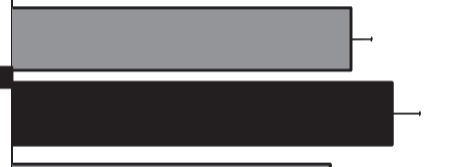

*Major allele*  
*rs2067006*

A T CT Luc

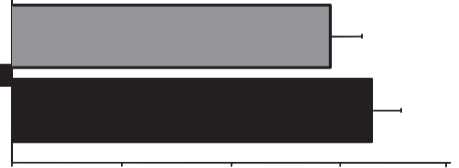

Relative Light Units (RLU)
